# Supplementary material for: Ets-1 promoter-associated noncoding RNA regulates the NONO/ERG/Ets-1 axis to drive gastric cancer progression
Source: PubMed Central journal article supplement (PMC6117270; doi:10.1038/s41388-018-0302-4), 2018-05-18

# Supplementary Figure S4

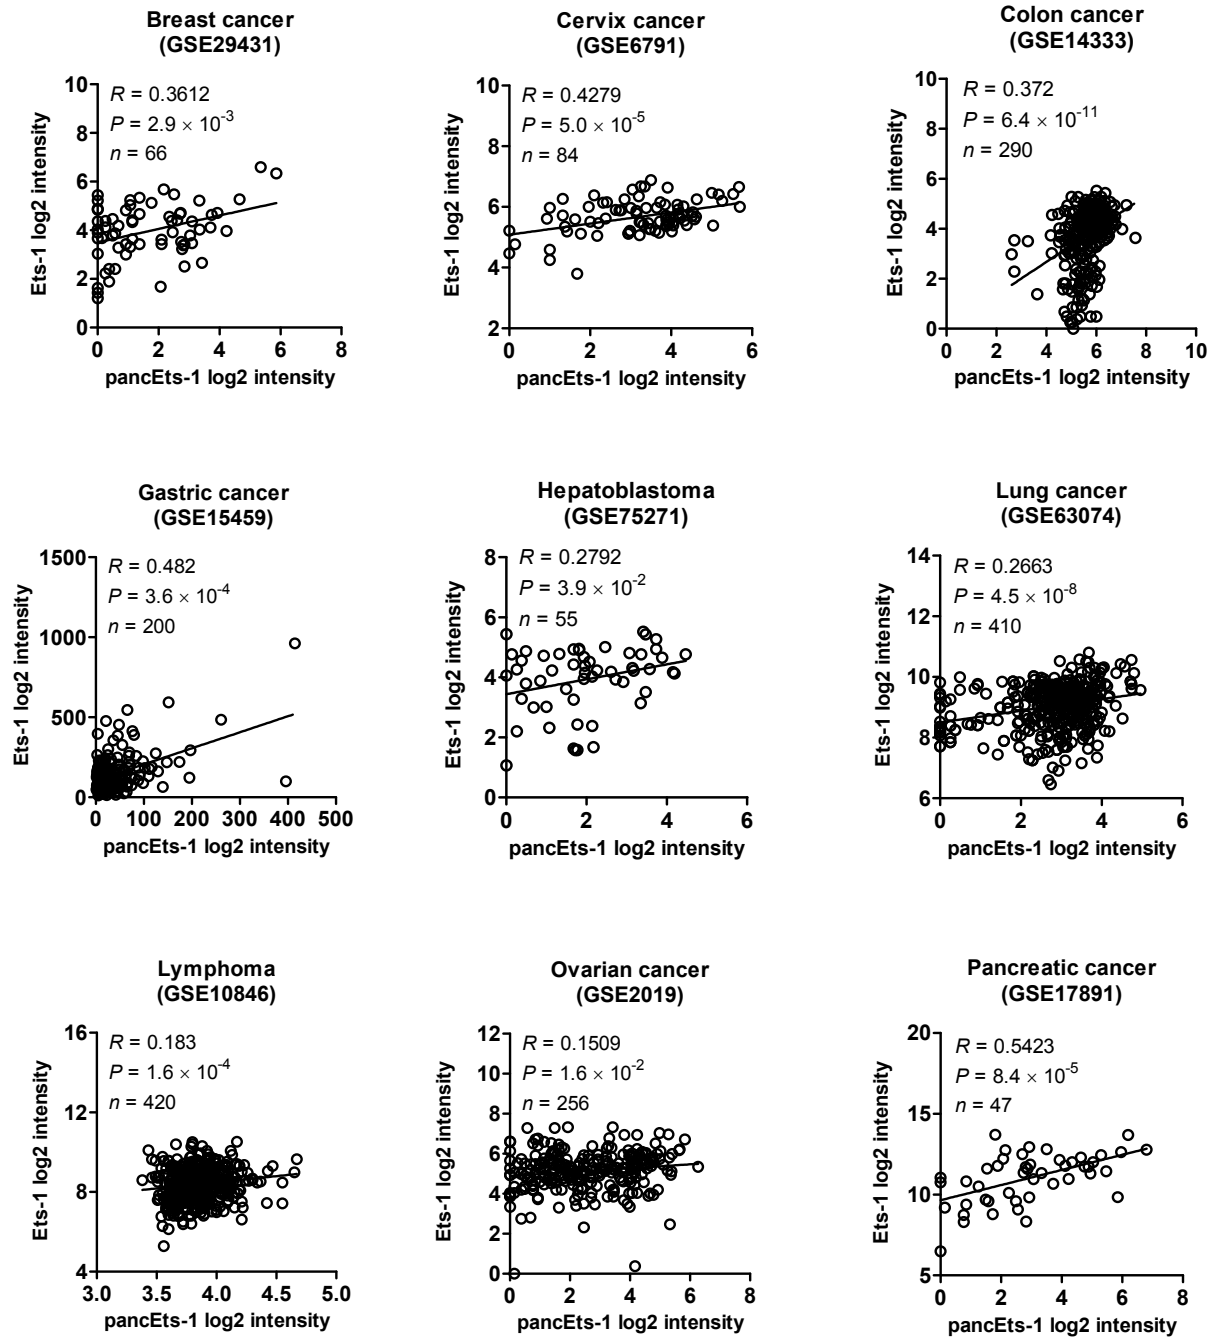

Supplement: 41388_2018_302_MOESM5_ESM.pdf [file 41388_2018_302_MOESM5_ESM.pdf]
